# Supplementary material
Source: Springer Nature journal article supplement (https://www.springermedizin.de/resource/supplementary/12888_2011_893_MOESM2_ESM.pdf/9478472)

Funnel plot

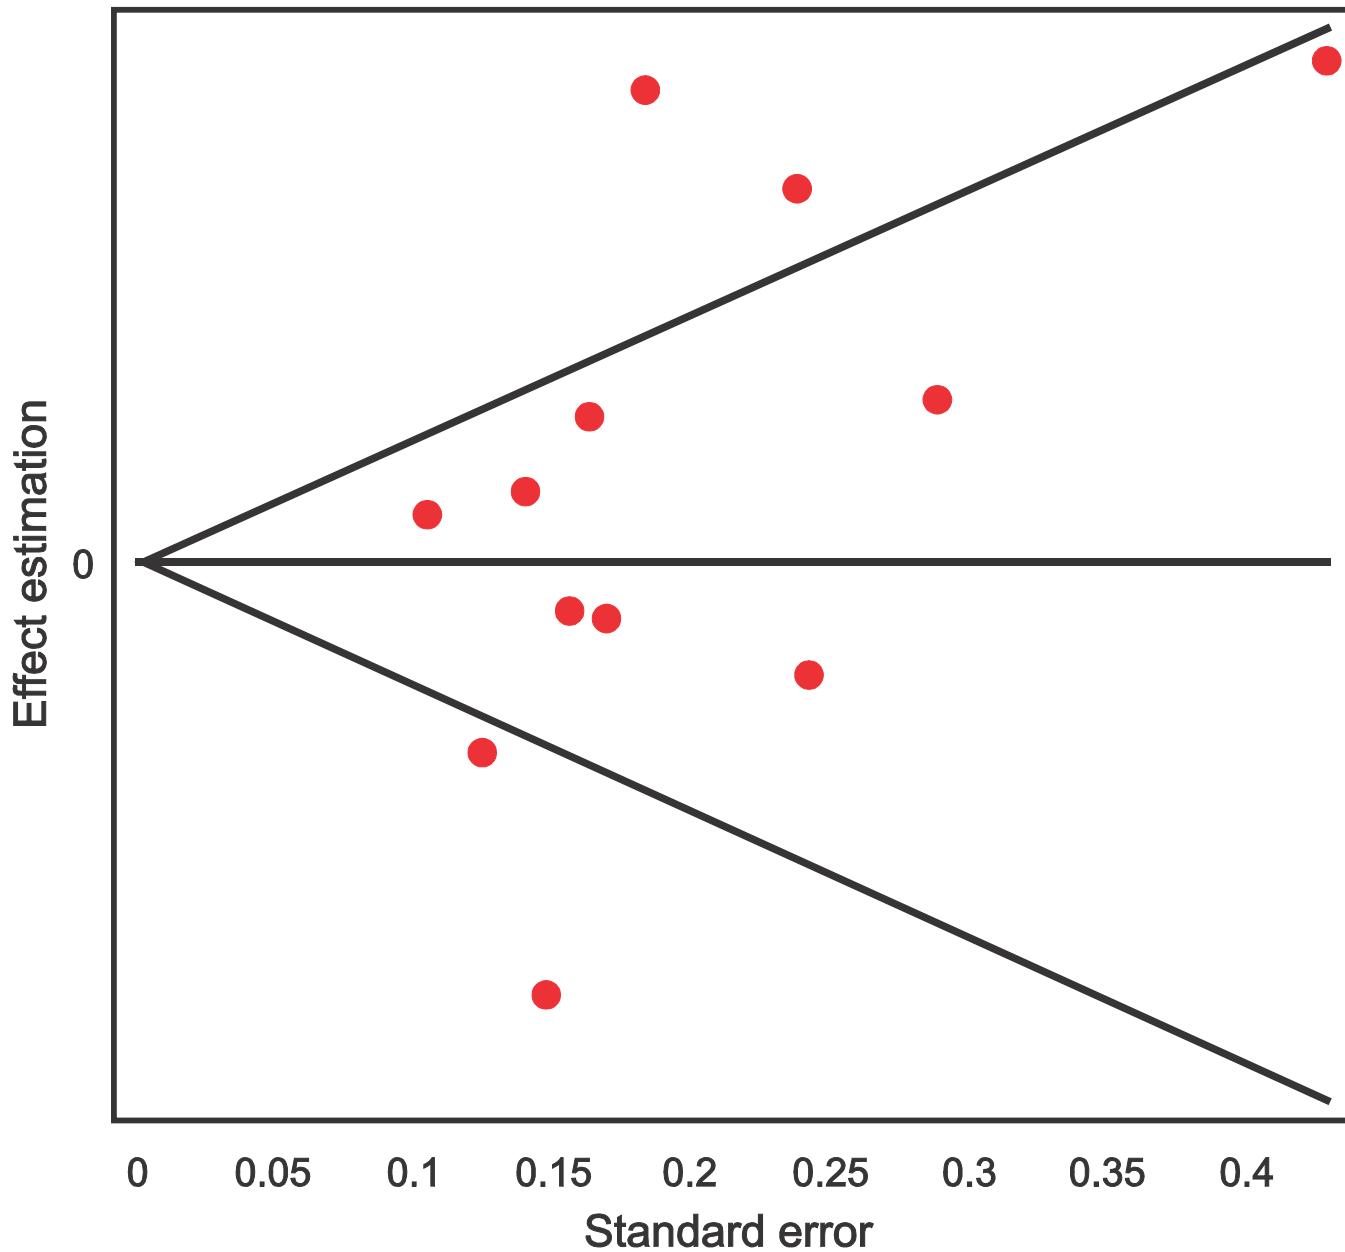

Supplement: MOESM2 [file 9478472]
